# Supplementary material for: Collection and Elicitation of Business Process Compliance Patterns with Focus on Data Aspects
Source: Springer Nature journal article supplement (doi:10.1007/s12599-019-00594-3), 2019-03-29
Supplement: MOESM1 [file 16586292]

# **Collection and Elicitation of Business Process Compliance Patterns with Focus on Data Aspects**

**Thomas Voglhofer, Stefanie Rinderle-Ma**

Business & Information Systems Engineering (2019)

**Appendix (available online via <http://link.springer.com>)**

## A Horizontal Search Results

| Search Date / Search String                                                                                                                                                                               | # K.O.     | # Refinement | # Selection |
|-----------------------------------------------------------------------------------------------------------------------------------------------------------------------------------------------------------|------------|--------------|-------------|
| <i>22.08.2017</i>                                                                                                                                                                                         | 169        | 56           | 22          |
| ("business" OR ("process" OR "processes")) ("compliance") ("anti" OR "pattern" OR "patterns")                                                                                                             | 14         | 8            | 3           |
| ("business" OR ("process" OR "processes")) ("compliance") ("monitoring")                                                                                                                                  | 33         | 9            | 2           |
| ("business" OR ("process" OR "processes")) ("compliance") ("constraint" OR "constraints")                                                                                                                 | 8          | 7            | 1           |
| ("business" OR ("process" OR "processes")) ("compliance") ("framework")                                                                                                                                   | 40         | 12           | 5           |
| ("business" OR ("process" OR "processes")) ("compliance") ("mining")                                                                                                                                      | 2          | 0            | 0           |
| ("business" OR ("process" OR "processes")) ("compliance") ("rule" OR "rules" OR "rule-based")                                                                                                             | 44         | 16           | 8           |
| ("business" OR ("process" OR "processes")) ("compliance") ("validation" OR "validations")                                                                                                                 | 10         | 0            | 0           |
| ("business" OR ("process" OR "processes")) ("compliance") ("verification" OR "verifications")                                                                                                             | 10         | 1            | 1           |
| ("business" OR ("process" OR "processes")) ("compliance") ("violation" OR "violations")                                                                                                                   | 8          | 3            | 2           |
| <i>23.08.2017</i>                                                                                                                                                                                         | 347        | 42           | 9           |
| ("business" OR ("process" OR "processes")) ("constraint" OR "constraints" OR "rule" OR "rules" OR "anti" OR "pattern" OR "patterns") ("mining")                                                           | 99         | 10           | 1           |
| ("business" OR ("process" OR "processes")) ("constraint" OR "constraints" OR "rule" OR "rules" OR "anti" OR "pattern" OR "patterns") ("monitoring")                                                       | 129        | 7            | 3           |
| ("business" OR ("process" OR "processes")) ("constraint" OR "constraints" OR "rule" OR "rules" OR "anti" OR "pattern" OR "patterns") ("validation" OR "validations" OR "verification" OR "verifications") | 87         | 20           | 2           |
| ("business" OR ("process" OR "processes")) ("constraint" OR "constraints" OR "rule" OR "rules" OR "anti" OR "pattern" OR "patterns") ("violation" OR "violations")                                        | 32         | 5            | 3           |
| <i>25.08.2017</i>                                                                                                                                                                                         | 172        | 9            | 1           |
| ("business" OR ("process" OR "processes")) ("constraint" OR "constraints" OR "rule" OR "rules" OR "anti" OR "pattern" OR "patterns") ("mining")                                                           | 108        | 7            | 1           |
| ("business" OR ("process" OR "processes")) ("validation" OR "validations" OR "verification" OR "verifications") ("runtime" OR "model-based" OR "design-time" OR "design time")                            | 64         | 2            | 0           |
| <i>06.07.2018</i>                                                                                                                                                                                         | 110        | 2            | 2           |
| ("process" OR "processes") ("data") ("constraint" OR "constraints")                                                                                                                                       | 38         | 2            | 1           |
| ("process" OR "processes") ("data") ("rule" OR "rules")                                                                                                                                                   | 58         | 0            | 0           |
| ("process" OR "processes") ("data") ("compliance")                                                                                                                                                        | 14         | 2            | 1           |
| <b>Total</b>                                                                                                                                                                                              | <b>798</b> | <b>111</b>   | <b>34</b>   |

The 34 selected literature documents are: Awad et al. (2009); Awad (2010); Awad and Weske (2010); Awad et al. (2011, 2015); Barnawi et al. (2016); Becker et al. (2010); Bernardi et al. (2014); Cabanillas et al. (2010); Caron et al. (2013a,b); Cheikhrouhou et al. (2014); Chesani et al. (2008, 2009); De Masellis et al. (2014); El Gammal (2012); Elgammal et al. (2016); Gomez-Lopez et al. (2013); Gong et al. (2016); Knuplesch and Reichert (2017); Kumar et al. (2010, 2015); Kumar and Barton (2017); Lam (2017); Ly et al. (2010, 2011, 2015); Ly (2016); Maggi et al. (2011); Montali et al. (2014); Thullner et al. (2011); Türetken et al.; Stuht et al. (2012); van der Aalst et al. (2017)

---

## B Vertical Search Results

| Search Date / Search String                                                                      | # K.O.    | # Refinement | # Selection |
|--------------------------------------------------------------------------------------------------|-----------|--------------|-------------|
| <i>18.09.2017</i>                                                                                | <i>15</i> | <i>15</i>    | <i>11</i>   |
| “A framework for the systematic comparison and evaluation of compliance monitoring approaches”   | 1         | 1            | 0           |
| “Business provenancea technology to increase traceability of end-to-end operations”              | 1         | 1            | 0           |
| “Capturing Compliance Requirements: A Pattern-Based Approach”                                    | 1         | 1            | 1           |
| “Data-flow anti-patterns: Discovering data-flow errors in workflows”                             | 1         | 1            | 1           |
| “From regulatory policies to event monitoring rules: Towards model-driven compliance automation” | 1         | 1            | 1           |
| “Making business processes compliant to standards and regulations”                               | 1         | 1            | 1           |
| “Modeling business rules for supervisory control of process-aware information systems”           | 1         | 1            | 1           |
| “Pattern based property specification and verification for service composition”                  | 1         | 1            | 1           |
| “Patterns for Timed Property Specifications”                                                     | 1         | 1            | 1           |
| “Property specification patterns for finite-state verification”                                  | 1         | 1            | 1           |
| “Root-cause analysis of design-time compliance violations on the basis of property patterns”     | 1         | 1            | 1           |
| “Specification patterns for time-related properties”                                             | 1         | 1            | 1           |
| “Understanding non-compliance”                                                                   | 1         | 1            | 1           |
| “Workflow data patterns”                                                                         | 1         | 1            | 0           |
| “Workflow Data Patterns: Identification, Representation and Tool Support”                        | 1         | 1            | 0           |
| <i>18.06.2018</i>                                                                                | <i>1</i>  | <i>1</i>     | <i>1</i>    |
| “Business Process Compliance through Reusable Units of Compliant Processes”                      | 1         | 1            | 1           |
| <i>04.07.2018</i>                                                                                | <i>1</i>  | <i>1</i>     | <i>1</i>    |
| “On managing business processes variants”                                                        | 1         | 1            | 1           |
| <b>Total</b>                                                                                     | <b>17</b> | <b>17</b>    | <b>13</b>   |

The 13 selected literature documents are: Dwyer et al. (1998); Elgammal et al. (2010); Giblin et al. (2006); Gruhn and Laue (2005, 2006); Lu et al. (2009); Papazoglou (2011); Ramezani (2017); Santos et al. (2012); Schumm et al. (2010); Trčka et al. (2009); Turetken et al. (2012); Yu et al. (2006)

## C Perspectives and Properties (Explicitly) Mentioned

A ✓ indicates that a perspective/property is *explicitly mentioned* in literature, whereas (✓) stands for *implicitly mentioned*. No entry represents *not mentioned*.

| Source                        | Occurrence | Order | Control flow | Data | Resources | Time | Atomic | Composite | Anti-pattern |
|-------------------------------|------------|-------|--------------|------|-----------|------|--------|-----------|--------------|
| Awad et al. (2009)            |            | ✓     | ✓            |      |           |      |        |           |              |
| Awad (2010)                   | ✓          | ✓     | ✓            | ✓    | ✓         | ✓    |        |           | ✓            |
| Awad and Weske (2010)         |            | ✓     | ✓            |      |           |      |        |           | ✓            |
| Awad et al. (2011)            | ✓          | ✓     | ✓            | ✓    |           |      |        |           | ✓            |
| Awad et al. (2015)            | ✓          | ✓     | ✓            |      | ✓         |      | ✓      | ✓         | ✓            |
| Barnawi et al. (2016)         | ✓          | ✓     | ✓            |      | ✓         |      | ✓      | ✓         | ✓            |
| Becker et al. (2010)          | (✓)        | (✓)   | ✓            |      |           |      |        |           |              |
| Bernardi et al. (2014)        | (✓)        | (✓)   | (✓)          |      |           |      |        | (✓)       | (✓)          |
| Cabanillas et al. (2010)      |            | (✓)   | (✓)          | ✓    |           |      |        |           |              |
| Caron et al. (2013a)          | ✓          | ✓     | ✓            | ✓    | ✓         | ✓    |        |           |              |
| Caron et al. (2013b)          | ✓          | ✓     | ✓            | ✓    | ✓         | ✓    |        | ✓         |              |
| Cheikhrouhou et al. (2014)    |            |       |              |      |           | ✓    |        |           |              |
| Chesani et al. (2008)         | ✓          | (✓)   | ✓            |      | (✓)       |      |        |           |              |
| Chesani et al. (2009)         | ✓          | (✓)   | ✓            |      | (✓)       |      |        |           |              |
| De Masellis et al. (2014)     | (✓)        | (✓)   | (✓)          |      |           |      |        |           |              |
| Dwyer et al. (1998)           | ✓          | ✓     | ✓            |      |           |      |        | ✓         |              |
| El Gammal (2012)              | ✓          | ✓     | ✓            |      | ✓         | ✓    | ✓      | ✓         |              |
| Elgammal et al. (2010)        | ✓          | ✓     | ✓            |      |           |      | ✓      | ✓         |              |
| Elgammal et al. (2016)        | ✓          | ✓     | ✓            |      | ✓         | ✓    | ✓      | ✓         |              |
| Giblin et al. (2006)          |            |       |              |      |           | ✓    |        |           |              |
| Gomez-Lopez et al. (2013)     | (✓)        | (✓)   | (✓)          |      |           |      |        |           |              |
| Gong et al. (2016)            | ✓          | ✓     | ✓            |      | ✓         | ✓    |        |           |              |
| Gruhn and Laue (2005)         | (✓)        | (✓)   | (✓)          |      |           | (✓)  |        |           |              |
| Gruhn and Laue (2006)         | ✓          | ✓     | ✓            |      |           | ✓    |        |           |              |
| Knuplesch and Reichert (2017) | ✓          | ✓     | ✓            |      | ✓         | ✓    |        |           |              |
| Kumar et al. (2010)           | (✓)        | (✓)   | (✓)          |      |           | ✓    |        |           |              |
| Kumar et al. (2015)           | ✓          | ✓     | ✓            |      |           | ✓    |        |           |              |
| Kumar and Barton (2017)       | ✓          | ✓     | ✓            |      |           | ✓    |        |           |              |
| Lam (2017)                    | (✓)        | (✓)   | (✓)          |      |           |      |        |           | (✓)          |
| Lu et al. (2009)              | (✓)        | (✓)   | (✓)          |      |           |      |        |           |              |
| Ly (2016)                     | ✓          | ✓     | ✓            |      |           |      |        |           |              |
| Ly et al. (2010)              | (✓)        | (✓)   | (✓)          |      |           |      |        |           |              |
| Ly et al. (2011)              | (✓)        | (✓)   | (✓)          |      |           |      |        |           |              |
| Ly et al. (2015)              | ✓          | ✓     | ✓            |      | ✓         |      |        |           |              |
| Maggi et al. (2011)           | (✓)        | (✓)   | (✓)          |      |           |      |        |           |              |
| Montali et al. (2014)         | ✓          | ✓     | ✓            |      |           |      |        |           | ✓            |
| Papazoglou (2011)             |            |       |              |      | ✓         | ✓    | ✓      | ✓         |              |
| Ramezani (2017)               | ✓          | ✓     | ✓            | ✓    | ✓         | ✓    | ✓      | ✓         |              |
| Santos et al. (2012)          |            | ✓     | ✓            |      |           |      |        |           |              |
| Schumm et al. (2010)          | (✓)        | ✓     | ✓            |      |           |      |        |           |              |
| Stuht et al. (2012)           | (✓)        | (✓)   | (✓)          | (✓)  | (✓)       |      |        |           |              |
| Thullner et al. (2011)        | (✓)        | ✓     | ✓            |      |           | ✓    |        |           |              |
| Trčka et al. (2009)           |            |       |              | ✓    |           |      |        |           | ✓            |
| Türetken et al.               |            |       |              |      |           | ✓    | ✓      | ✓         |              |
| Türetken et al. (2012)        | ✓          | ✓     | ✓            |      | ✓         | ✓    |        |           |              |
| van der Aalst et al. (2017)   | ✓          | ✓     | ✓            |      |           |      |        |           |              |
| Yu et al. (2006)              | ✓          | ✓     | ✓            |      |           |      |        |           |              |

---

**D Regulatory Documents Selection Criteria**

| <b>Source</b>                             | <b>RegC1</b>       | <b>RegC2</b> | <b>RegC3: Current</b> | <b>RegC3: In Future</b> |
|-------------------------------------------|--------------------|--------------|-----------------------|-------------------------|
| AnaCredit                                 | Financial industry | ✓            |                       | ✓                       |
| DPA 2000                                  | Data protection    | ✓            | ✓                     |                         |
| E-GovG                                    | e-Government       | ✓            | ✓                     | ✓                       |
| ELGA-VO 2015                              | Health care        | ✓            | ✓                     | ✓                       |
| GTelG 2012                                | Health care        | ✓            | ✓                     | ✓                       |
| Bank for International Settlements (2013) | Financial industry | ✓            | ✓                     | ✓                       |
| BSI Act 2009                              | IT security        | ✓            | ✓                     | ✓                       |
| IMA-VO 2011                               | Energy sector      | ✓            | ✓                     | ✓                       |
| Oesterreichs Energie (2018)               | Energy sector      | ✓            | ✓                     | ✓                       |
| Oesterreichs Energie (2015)               | Energy sector      | ✓            | ✓                     | ✓                       |

---

## E Atomic Data-Oriented Constraints Mapped to CPs

| No. | Atomic Data-Oriented Constraint                          | CP Name                                                         |
|-----|----------------------------------------------------------|-----------------------------------------------------------------|
|     |                                                          | Event data multiplicity rule                                    |
|     |                                                          | Logical derivation rule                                         |
|     |                                                          | Event data equality rule                                        |
|     |                                                          | Disjunctive event data rule                                     |
|     |                                                          | Mutually exclusive event data rule                              |
|     |                                                          | Arithmetic derivation rule                                      |
|     |                                                          | Logical derivation rule                                         |
| 1   | Data must be accurate / consistent / must have integrity | Event data equality rule                                        |
|     |                                                          | Event data exclusion rule                                       |
|     |                                                          | Time-oriented integrity rule                                    |
|     |                                                          | Activity-oriented integrity rule                                |
|     |                                                          | Event-oriented integrity rule                                   |
|     |                                                          | Event data value set rule                                       |
|     |                                                          | Event data value range rule                                     |
|     |                                                          | Event data uniqueness rule                                      |
|     |                                                          | Irreflexive event data rule                                     |
|     |                                                          | Event data format rule                                          |
| 3   | Data must be available/complete                          | Mandatory event data rule                                       |
| 4   | Data must be calculated using formula                    | Arithmetic derivation rule                                      |
| 5   | Data must be equal/have the same values                  | Event data equality rule                                        |
| 7   | Data must be in domain                                   | Event data value set rule                                       |
| 8   | Data must be in range                                    | Event data value range rule                                     |
| 9   | Data must be missing                                     | $\neg$ Mandatory event data rule                                |
| 12  | Data must be unique                                      | Event data uniqueness rule                                      |
| 13  | Data must be unique over time                            | Event data uniqueness rule                                      |
| 14  | Data must conform to a specific format                   | Event data format rule                                          |
| 15  | Data must not be changed                                 | Time-oriented integrity rule & Activity-oriented integrity rule |
| 16  | Data must not be used                                    | Data element never read rule                                    |
| 18  | Data origin must be known                                | Mandatory event data rule                                       |
| 19  | Data purpose must be known                               | Mandatory event data rule                                       |

## F Unmapped CPs

| Source                                    | CP                                                        | Status                       | Remark                                     |
|-------------------------------------------|-----------------------------------------------------------|------------------------------|--------------------------------------------|
| Barnawi et al. (2016)                     | Next Anti Patterns                                        | Open                         | Insufficient description available         |
|                                           | Precedence isBefore                                       | Open                         | Insufficient description available         |
|                                           | Precedes Anti Patterns                                    | Open                         | Insufficient description available         |
|                                           | Response Anti Patterns                                    | Open                         | Insufficient description available         |
|                                           | Response isBefore                                         | Open                         | Insufficient description available         |
|                                           | Sequence Anti Patterns                                    | Open                         | Insufficient description available         |
| Cabanillas et al. (2010)                  | Sequence isBefore                                         | Open                         | Insufficient description available         |
|                                           | Prohibited data                                           | NA                           | Included in resource CPs                   |
|                                           | Data rule violation                                       | NA                           | Comprises a set of compliance problems     |
| Gomez-Lopez et al. (2013)                 | Data object life cycle conformance                        | NA                           | Comprises a set of compliance problems     |
|                                           | Data object life cycle coverage                           | NA                           | Comprises a set of compliance problems     |
|                                           | $A_{EX} \wedge B_{EX} \wedge A_T < B_T$                   | NA                           | Only antecedent part of a composite CP     |
|                                           | $A_{EX} \wedge \neg(B_{EX} \wedge A_T < B_T)$             | NA                           | Only antecedent part of a composite CP     |
| El Gammal (2012)                          | $B_{EX} \wedge \neg(A_{EX} \wedge A_T < B_T)$             | NA                           | Only antecedent part of a composite CP     |
|                                           | $\rightarrow A_{EX} \wedge \neg(B_{EX} \wedge A_T < B_T)$ | NA                           | Only antecedent part of a composite CP     |
|                                           | $\rightarrow B_{EX} \wedge \neg(A_{EX} \wedge A_T < B_T)$ | NA                           | Only antecedent part of a composite CP     |
|                                           | AtLeastAfter                                              | NA                           | Only time restriction part of composite CP |
|                                           | Every                                                     | NA                           | Only time restriction part of composite CP |
|                                           | ExactlyAfter                                              | NA                           | Only time restriction part of composite CP |
|                                           | ExactDur                                                  | NA                           | Only time restriction part of composite CP |
| Knuplesch and Reichert (2017)             | ExactlyAt                                                 | NA                           | Only time restriction part of composite CP |
|                                           | MaxDur                                                    | NA                           | Only time restriction part of composite CP |
|                                           | MinDur                                                    | NA                           | Only time restriction part of composite CP |
|                                           | Within                                                    | NA                           | Only time restriction part of composite CP |
|                                           | After k                                                   | NA                           | Only time restriction part of composite CP |
|                                           | ExactlyAt k                                               | NA                           | Only time restriction part of composite CP |
| Papazoglou (2011)                         | Exists Every k                                            | NA                           | Only time restriction part of composite CP |
|                                           | Exists Max/Min k                                          | NA                           | Only time restriction part of composite CP |
|                                           | Exists Max/Min k                                          | NA                           | Only time restriction part of composite CP |
| Ramezani (2017)                           | Within k                                                  | NA                           | Only time restriction part of composite CP |
|                                           | AtLeastAfter k                                            | NA                           | Only time restriction part of composite CP |
|                                           | ExactlyAt k                                               | NA                           | Only time restriction part of composite CP |
|                                           | Within k                                                  | NA                           | Only time restriction part of composite CP |
|                                           | Between                                                   | NA                           | Included in Control Flow CPs               |
|                                           | Bounded Existence. Lower                                  | NA                           | Included in Control Flow CPs               |
|                                           | Bound                                                     |                              |                                            |
|                                           | Bounded Existence. Upper                                  | NA                           | Included in Control Flow CPs               |
|                                           | Bound                                                     |                              |                                            |
|                                           | Bounded Sequence                                          | NA                           | Included in Control Flow CPs               |
|                                           | Chain Precedence                                          | NA                           | Included in Control Flow CPs               |
|                                           | Chain Response                                            | NA                           | Included in Control Flow CPs               |
|                                           | Cyclic Occurrence                                         | NA                           | Included in Control Flow CPs               |
|                                           | Exclusive                                                 | NA                           | Included in Control Flow CPs               |
| Existence and Bounded Existence           | NA                                                        | Included in Control Flow CPs |                                            |
| Inclusive, Pre-requisite and Co-requisite | NA                                                        | Included in Control Flow CPs |                                            |
| Negative Precedence or Response           | NA                                                        | Included in Control Flow CPs |                                            |
| Not-in-Between                            | NA                                                        | Included in Control Flow CPs |                                            |
| Parallel. During (Activity)               | NA                                                        | Included in Control Flow CPs |                                            |
| Parallel. During (Sequence of Activities) | NA                                                        | Included in Control Flow CPs |                                            |
| Parallel. Simultaneous                    | NA                                                        | Included in Control Flow CPs |                                            |
| Sequence of (Multiple) Activities         | NA                                                        | Included in Control Flow CPs |                                            |
| Substitute                                | NA                                                        | Included in Control Flow CPs |                                            |
| Türetken et al.                           | AtLeastAfter k                                            | NA                           | Only time restriction part of composite CP |
|                                           | ExactlyAt k                                               | NA                           | Only time restriction part of composite CP |
|                                           | Within k                                                  | NA                           | Only time restriction part of composite CP |
| Türetken et al. (2012)                    | After k                                                   | NA                           | Only time restriction part of composite CP |
|                                           | ExactlyAt k                                               | NA                           | Only time restriction part of composite CP |
|                                           | Within k                                                  | NA                           | Only time restriction part of composite CP |

---

## G CP Design for Atomic Data-Oriented Constraints

|                                     |                                                                                                                                                                                                                                                                                  |
|-------------------------------------|----------------------------------------------------------------------------------------------------------------------------------------------------------------------------------------------------------------------------------------------------------------------------------|
| Atomic data-oriented constraint no. | 6                                                                                                                                                                                                                                                                                |
| Atomic data-oriented constraint     | Data must be from a certain time span                                                                                                                                                                                                                                            |
| CP name                             | Event data creation time span CP                                                                                                                                                                                                                                                 |
| CP description                      | The value of event data type $p_I$ (wrt an event of type $e_I$ for an activity of type $a_I$ with creation time $t_{creation}$ ) at time point $t$ must be from absolute time span $ts$                                                                                          |
| Related existing CPs                | <i>Mandatory event data rule; Time-oriented integrity rule; Data element existence rule</i>                                                                                                                                                                                      |
| Formal specification                | EVENTS: Validate(value <sub>p<sub>1</sub></sub> , t <sub>creation</sub> )<br>STATEMENTS: $\forall t$<br>Happens(Validate(value <sub>p<sub>1</sub></sub> , t <sub>creation</sub> ), t) $\rightarrow$ t <sub>start</sub> $\leq$ t <sub>creation</sub> $\leq$ t <sub>end</sub>      |
| <hr/>                               |                                                                                                                                                                                                                                                                                  |
| Atomic data-oriented constraint no. | 10                                                                                                                                                                                                                                                                               |
| Atomic data-oriented constraint     | Data must be of certain granularity                                                                                                                                                                                                                                              |
| CP name                             | Event data granularity CP                                                                                                                                                                                                                                                        |
| CP description                      | The value of event data type $p_I$ (wrt an event of type $e_I$ for an activity of type $a_I$ ) at time point $t$ must be of granularity $g$                                                                                                                                      |
| Related existing CPs                | <i>Mandatory event data rule; Event data value set rule; Event data value range rule; Event data format rule</i>                                                                                                                                                                 |
| Formal specification                | EVENTS: Validate(value <sub>p<sub>1</sub></sub> , g)<br>FLUENTS: IsOfGranularity(value <sub>p<sub>1</sub></sub> , g)<br>STATEMENTS:<br>Happens(Validate(value <sub>p<sub>1</sub></sub> , g), t) $\rightarrow$<br>HoldsAt(IsOfGranularity(value <sub>p<sub>1</sub></sub> , g), t) |
| <hr/>                               |                                                                                                                                                                                                                                                                                  |
| Atomic data-oriented constraint no. | 11                                                                                                                                                                                                                                                                               |
| Atomic data-oriented constraint     | Data must be of specific data type                                                                                                                                                                                                                                               |
| CP name                             | Event data type CP                                                                                                                                                                                                                                                               |
| CP description                      | The value of event data type $p_I$ (wrt an event of type $e_I$ for an activity of type $a_I$ ) at time point $t$ must be of data type $dt$                                                                                                                                       |
| Related existing CPs                | <i>Event data format rule; Arithmetic derivation rule; Logical derivation rule</i>                                                                                                                                                                                               |
| Formal specification                | EVENTS: Validate(value <sub>p<sub>1</sub></sub> , dt)<br>FLUENTS: IsOfDataType(value <sub>p<sub>1</sub></sub> , dt)<br>STATEMENTS:<br>Happens(Validate(value <sub>p<sub>1</sub></sub> , dt), t) $\rightarrow$<br>HoldsAt(IsOfDataType(value <sub>p<sub>1</sub></sub> , dt), t)   |
| <hr/>                               |                                                                                                                                                                                                                                                                                  |
| Atomic data-oriented Constraint no. | 17                                                                                                                                                                                                                                                                               |
| Atomic data-oriented constraint     | Data must be encrypted/decrypted                                                                                                                                                                                                                                                 |
| CP name                             | Event data encryption CP                                                                                                                                                                                                                                                         |
| CP description                      | The value of event data type $p_I$ (wrt an event of type $e_I$ for an activity of type $a_I$ ) at time point $t$ must be encrypted                                                                                                                                               |
| Related existing CPs                | <i>Arithmetic derivation rule; Logical derivation rule; Event data format rule</i>                                                                                                                                                                                               |
| Formal specification                | EVENTS: Validate(value <sub>p<sub>1</sub></sub> )<br>FLUENTS: IsEncrypted(value <sub>p<sub>1</sub></sub> )<br>STATEMENTS:<br>Happens(Validate(value <sub>p<sub>1</sub></sub> ), t) $\rightarrow$<br>HoldsAt(IsEncrypted(value <sub>p<sub>1</sub></sub> ), t)                     |
